# Supplementary material for: Facile sonochemical synthesis of highly dispersed ultrafine Pd nanoparticle decorated carbon nano-onions with high metal loading and enhanced electrocatalytic activity
Source: Royal Society of Chemistry journal article supplement (doi:10.1039/c6ra18190b), 2016-01-01
Supplement: c6ra18190b1.pdf [file c6ra18190b1.pdf]

## Supporting information

### Facile sonochemical synthesis of highly dispersed ultrafine Pd nanoparticle decorated carbon nano-onions with high metal loading and enhanced electrocatalytic activity

Aasiya Shaikh and Smrutiranjana Parida\*

Department of Metallurgical Engineering and Materials Science, I.I.T. Bombay, Mumbai, INDIA-400076

\*Corresponding author. Tel: +91-22-2576-7643

E-mail: paridasm@iitb.ac.in (S. Parida)

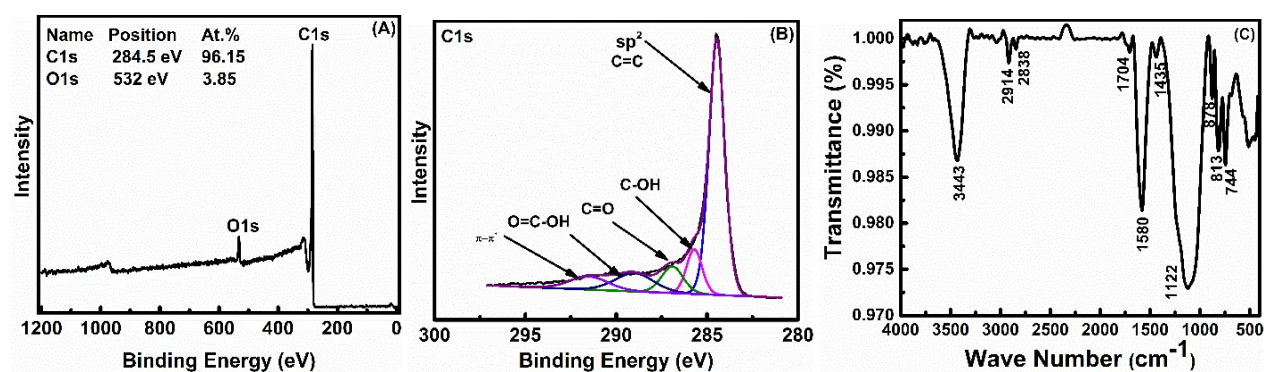

Fig 1S: Characterization of as-synthesized CNO (A) wide scan XPS spectrum, (B) C1s spectrum and (C) FT-IR spectra, showing the presence of oxygen functionalities.
